1  
2  
3  
4  
5  
6  
7  
8  
9  
10  
11  
12  
13  
14  
15  
16  
17  
18  
19  
20  
21  
22  
23  
24  
25  
26  
27  
28  
29  
30  
31

Title:

**Intermitochondrial signaling regulates the uniform distribution of stationary mitochondria in axons**

Affiliations of authors:

Nozomu Matsumoto<sup>1</sup>, Ikuma Hori<sup>2</sup>, Tomoya Murase<sup>3</sup>, Takahiro Tsuji<sup>4,5</sup>, Seiji Miyake<sup>4,5</sup>, Masaru Inatani<sup>4,5</sup> and Yoshiyuki Konishi<sup>2,3,5,\*</sup>

<sup>1</sup>Department of Human and Artificial Intelligence Systems, <sup>2</sup>Department of Applied Chemistry and Biotechnology, and <sup>3</sup>Department of Materials Science and Biotechnology, Faculty of Engineering, University of Fukui, Fukui 910-8507, Japan

<sup>4</sup>Department of Ophthalmology, Faculty of Medical Science, University of Fukui, Fukui, 910-1193, Japan

<sup>5</sup>Life Science Innovation Center, University of Fukui, Fukui 910-8507, Japan

\*Corresponding author:

Yoshiyuki Konishi, ORCID: [orcid.org/0000-0001-7594-9921](https://orcid.org/0000-0001-7594-9921)

Department of Applied Chemistry and Biotechnology, Faculty of Engineering, University of Fukui, 3-9-1 Bunkyo, Fukui 910-8507, Japan

Phone: +81 776-27-8048

E-mail: [ykonishi@u-fukui.ac.jp](mailto:ykonishi@u-fukui.ac.jp)

Keywords:

stationary mitochondria, axonal transport, mitochondrial distribution, ATP, cerebellar granule neurons, retinal ganglion cells

1 **ABSTRACT**

2           In the central nervous system, many neurons develop axonal arbors that are  
3 crucial for information processing. Previous studies have demonstrated that premature  
4 axons contain motile and stationary mitochondria, and their balance is important for  
5 axonal arborization. However, the mechanisms by which neurons determine the  
6 positions of stationary mitochondria as well as their turnover remain to be elucidated. In  
7 this study, we investigated the regulation of spatiotemporal group dynamics of  
8 stationary mitochondria. We observed that the distribution of stationary mitochondrial  
9 spots along the unmyelinated and nonsynaptic axons is not random but rather relatively  
10 uniform both in vitro and in vivo. Intriguingly, whereas the positions of each  
11 mitochondrial spot changed over time, the overall distribution remained uniform. In  
12 addition, local inactivation of mitochondria inhibited the translocation of mitochondrial  
13 spots in adjacent axonal regions, suggesting that functional mitochondria enhance the  
14 motility of neighboring mitochondria. Furthermore, we showed that the ATP  
15 concentration was relatively high around mitochondria, and treating axons with  
16 phosphocreatine, which supplies ATP, reduced the immobile mitochondria induced by  
17 local mitochondrial inhibition. These observations indicate that intermitochondrial  
18 interactions, mediated by ATP signaling, control the uniform distribution of axonal  
19 mitochondria. The present study reveals a novel cellular system that collectively  
20 regulates stationary mitochondria in axons.  
21

## 1 INTRODUCTION

2

3           The regulation of mitochondrial transport in axons plays critical roles in the  
4 function of neurons by regulating axonal morphology and modulating presynaptic  
5 functions (1-6). They are frequently found in places consuming high energy, such as the  
6 nodes of Ranvier, presynaptic sites and growing axonal terminals (7-9). Microtubules  
7 and kinesin-1 play roles in transporting mitochondria from the cell body to axonal  
8 terminals, whereas dynein mediates retrograde transport. Defects in these transport  
9 systems are implicated in neurological disorders (10, 11). Despite the accumulating  
10 body of knowledge on the molecular mechanisms that regulate mitochondrial transport,  
11 the intracellular systems by which neurons simultaneously regulate mitochondrial  
12 distribution and dynamics along axons remain to be elucidated. Previous studies have  
13 revealed that in the axons of mature cortical or hippocampal neurons, mitochondria are  
14 immobilized for an extended period of time at presynaptic sites (9, 12).

15           Importantly, even in premature axons before synaptic maturation (i.e., 3-7  
16 days *in vitro* (DIV)), mitochondria are generally stationary. The mitochondrial  
17 anchoring protein syntaphilin (SNPH) mediates mitochondria docking on microtubules  
18 (1, 13). Loss of SNPH dramatically increases the number of motile mitochondria in  
19 axons at early stages (1). Inhibition of SNPH function was accompanied by a reduction  
20 in axonal branches in cortical neurons at 5 DIV (2), indicating that these stationary  
21 mitochondria are required for the development of normal axonal arbors. Considering  
22 that axonal remodeling and presynaptic elimination take place in the adult central  
23 nervous system (CNS), these mechanisms may also contribute to the function of the  
24 CNS throughout one's lifespan. Moreover, parts of the axonal segment do not contain a  
25 presynaptic structure or myelinated region, including the retinal nerve fiber layer, a  
26 typical example for unmyelinated and nonsynaptic axonal regions, in which  
27 mitochondrial movement is occasionally observed (14) to be different from the  
28 presynaptic site of cortical neurons (9). In addition, a recent study revealed that SNPH  
29 inhibits the degeneration of demyelinated axons (15). These evidences points to the  
30 importance of understanding the systems regulating the dynamics and distribution of  
31 stationary mitochondria in the absence of mature presynaptic sites or nodes of Ranvier.  
32 More than a decade ago, Miller and Sheetz reported (16) a uniform mitochondrial

1 distribution along the axon of sensory neurons, although the generality of this important  
2 finding has not been verified, and its control mechanism is unknown. The present study  
3 aimed to uncover the system that regulates the distribution and dynamics of  
4 mitochondrial populations in axons.

5

6

## 7 **RESULTS**

8

### 9 **Dynamics of axonal mitochondria in premature CGNs in vitro**

10 We began our investigation to determine whether there is a system that regulates  
11 the distribution and/or group dynamics of axonal mitochondria by using young  
12 cerebellar granule neurons (CGNs). They do not form functional synapses with each  
13 other; thus, they are suitable for studying cell-autonomous systems. Although a large  
14 part of presynaptic sites remain orphaned, presynaptic clusters on axons start to make  
15 contact with postsynaptic sites around the first week in culture (17). To exclude the  
16 effect of postsynaptic sites, neurons were placed inside of a silicon chamber; the next  
17 day, the silicon chamber was removed to allow axons to grow outside of the plating area  
18 without contacting the dendrites of other neurons (Fig. 1A). After axonal extension,  
19 mitochondria were stained with MitoTracker Red CMH<sub>2</sub>-XRos. In accordance with  
20 previous reports of hippocampal neurons and cortical neurons (1, 2), both stationary and  
21 motile mitochondria exist in axons of CGNs at 3 DIV (Fig. 1B, C). The proportion of  
22 stationary mitochondria significantly increased as the axon matured, and most of the  
23 axonal mitochondria ( $93 \pm 2\%$ ,  $n = 5$  axons) were stationary for 15 min at 7 DIV (Fig.  
24 1C, D).

25 We next asked whether those stationary mitochondria stay at the same  
26 position for an extended period of time. A previous study using mature cortical neurons  
27 revealed that stable mitochondria remain at synaptic sites over 12 hrs (9). We monitored  
28 axonal mitochondria of 7 DIV CGNs for 6 hrs in 15 min intervals. The mitochondrial  
29 spots that did not change location during the first 15 min were defined as stationary. In  
30 many cases, stationary mitochondrial spots paused at the same position for 15 min but  
31 occasionally changed their location (Fig. 1E). We quantified the percentage of  
32 mitochondrial spots that stayed at the same position from the beginning of the



1 observational period and found that it decayed at a constant rate over time. Under this  
2 condition, 82% of stationary mitochondrial spots translocated at 96 min of half-life  
3 ( $t_{1/2}$ ), which was obtained by mathematically fitting the data to the one-phase decay  
4 model (Fig. 1F) ( $n = 6$  axons). These results suggest that most stationary mitochondria  
5 become motile mitochondria in a relatively short time that is constant in premature  
6 axons. The model fitting indicated that a small population (18%) of stationary  
7 mitochondrial spots would not change their location for an extended period of time at 7  
8 DIV. They likely represent immobilized mitochondria trapped in specific axonal sites,  
9 such as those in the mature presynaptic sites (9, 18).

### 11 **Stationary mitochondria distribute uniformly in axons**

12 Next, we analyzed the spatial distribution pattern of stationary mitochondria.  
13 CGNs were cultured and labeled with MitoTracker as in Fig. 1, fixed at 7 DIV, and  
14 stained with tubulin antibody to visualize axonal processes (Fig. 2A). Images of axonal  
15 segments (0-120  $\mu\text{m}$  from the terminal) that do not have branches were analyzed. After  
16 linearization and binarization, the number of mitochondrial spots in each compartment  
17 was quantified, and the  $I\delta$ -index, a dispersion index that enables the distribution pattern  
18 to be identified, was calculated. If the spatial distribution is random, the value of  $I\delta$  will  
19 approximately 1. If the spatial distribution is uniform,  $I\delta$  will be less than 1, and it will  
20 approach 1 as the compartment size increases. For a clustered distribution,  $I\delta$  will  
21 become more than 1 (Fig. 2B) (19). We found that the distribution of mitochondrial  
22 spots is typically uniform (Fig. 2C). Likewise, the frequency distribution of  
23 mitochondria was significantly different from the Poisson distribution, which represents  
24 a random distribution (Fig. 2D) (at 20  $\mu\text{m}$  compartment size;  $p < 0.01$  in  $\chi^2$  analysis,  $n =$   
25 20 axons). The density of mitochondrial spots in CGN axons at 7 DIV was  $10.3 \pm 0.7$   
26 per 100  $\mu\text{m}$  axonal segment. Given that most of the mitochondria of CGN axons are  
27 stationary at 7 DIV, our observations indicate a uniform distribution of stationary  
28 mitochondria.

29 We also analyzed the mitochondrial distribution in axons of cultured retinal  
30 ganglion cells (RGCs) at 8 DIV. Positions of stationary mitochondria were determined  
31 from the kymograph of time-lapse images, since a considerable number of motile  
32 mitochondria were observed in cultured RGC axons (Fig. S1A). Quantification revealed

1 a relatively uniform distribution of stationary mitochondria in RGC axons (Fig. S1B,  
2 C).

3

#### 4 **Mitochondrial distribution is relatively uniform in CNS axons in vivo**

5 To address whether mitochondria are uniformly distributed in vivo, we  
6 introduced expression vectors for mCherry-Mito and enhanced green fluorescent protein  
7 (EGFP) to the cerebellum of postnatal day 6 (P6) mice by electroporation (20). To  
8 minimize the effect of postsynaptic regulation, the cerebellum was isolated at P10, in  
9 which parallel fiber-Purkinje cell synapses have not yet been established (21). In  
10 coronal sections, EGFP-positive parallel fibers were detected from the inner part of the  
11 external granular layer to the molecular layer (Fig. 3A). The distribution of  
12 mitochondrial spots along parallel fibers was analyzed as shown in Fig. 2. The density  
13 of mitochondrial spots in parallel fiber axons of P10 mice was  $4.8 \pm 0.5$  per 100  $\mu\text{m}$ ,  
14 and some axons revealed high mitochondrial density. Clustering of mitochondrial spots  
15 was detected occasionally, as revealed by an increased  $I\delta$ -index at a compartment size  
16 of 10  $\mu\text{m}$  (Fig. 3B). Nevertheless, the  $I\delta$ -index profile revealed that mitochondrial spots  
17 are relatively uniformly distributed (Fig. 3B), and the frequency distribution of  
18 mitochondria was significantly different from the Poisson distribution (at 40  $\mu\text{m}$   
19 compartment size;  $p < 0.05$  in  $\chi^2$  analysis,  $n = 22$  axons), as it had a higher value around  
20 average density (Fig. 3C).

21 Since RGC axons in retinal nerve fibers are unmyelinated and do not form  
22 synapses even in the adult stage, we also analyzed the mitochondrial distribution in this  
23 region. We generated transgenic mice that express mitochondria-targeted yellow  
24 fluorescent protein (YFP) under the control of the *Thy1* promoter (*Thy1-mitoYFP*). Flat-  
25 mounted retinas prepared from 12-week-old mice revealed a large number of YFP-  
26 positive RGCs throughout the retina (Fig. S2) and YFP-positive mitochondria in RGC  
27 axons (Fig. 3D). The density of mitochondrial spots in RGC axons was  $13.1 \pm 0.4$  per  
28 100  $\mu\text{m}$ . The  $I\delta$ -index profile revealed that mitochondrial spots were relatively  
29 uniformly distributed (Fig. 3E), and the frequency distribution of mitochondria was  
30 significantly different from the Poisson distribution (at 20  $\mu\text{m}$  compartment size;  $p <$   
31  $0.001$  in  $\chi^2$  analysis,  $n = 38$  axons) (Fig. 3F). In conjunction with primary culture neuron  
32 analysis, these results suggest the existence of systems that uniformly distribute axonal

1 mitochondria in vivo.

2

### 3 **Positions of stationary mitochondria change over time**

4         These observations led us to hypothesize two possible mechanisms for  
5 regulating the distribution of stationary mitochondria (Fig. 4A). In the first model (a),  
6 mitochondrial anchoring sites are predetermined by anchoring molecules or other  
7 factors uniformly distributed in axons. In this case, the overall distribution of stationary  
8 mitochondria does not change over time, since even if a stationary mitochondrion  
9 moves away from a particular site, another mitochondria will be anchored at the same  
10 site. In the second model (b), anchoring sites for mitochondria are not predetermined,  
11 whereas mitochondria communicate with each other to control distances. In this case,  
12 the distribution of stationary mitochondria will change over an extended period of time.  
13 We noticed that the distribution of axonal mitochondria mostly changed in 120 min  
14 (Fig. 4B), by which time the majority of stationary mitochondria were replaced (Fig.  
15 1F). We extracted the positions of mitochondria that stayed at the same position  
16 between two adjacent frames (interval = 15 min). When these mitochondrial positions  
17 were compared with the positions of stationary mitochondria at 120 min, Pearson's  
18 correlation coefficient was largely decreased ( $r = 0.32$ ,  $p = 0.44$ ) and remained low after  
19 240 min ( $r = 0.41$ ,  $p = 0.32$ ) (Fig. 4C). In contrast, the I $\delta$ -index for the distribution of  
20 stationary mitochondria did not markedly change with time (e.g., 0 min;  $0.76 \pm 0.04$ ,  
21 120 min;  $0.73 \pm 0.04$ , 240 min;  $0.70 \pm 0.05$ , at 20  $\mu\text{m}$  of compartment size) (Fig. 4D).  
22 These results suggest that mitochondrial positions are not predetermined, but their  
23 relative position is maintained.

24

### 25 **Function of ATP on the regulation of stationary mitochondria**

26         If mitochondria communicate with each other to maintain a uniform distribution,  
27 some signaling molecules should be present. Since mitochondria produce ATP,  
28 clustering of stationary mitochondria may increase the local ATP concentration.  
29 Therefore, we investigated whether ATP itself functions as a signaling molecule to  
30 regulate the distribution of stationary mitochondria. First, we expressed PercevalHR, a  
31 genetic sensor for detecting the ATP:ADP ratio (22) in CGN. It senses changes in low  
32 concentrations of ATP compared to the original Perceval concentration. Signals excited

1 by a 488 nm (equivalent to ATP) laser were normalized by signals excited by 458 nm  
2 (close to the isosbestic point). Treatment with 1  $\mu$ M of oligomycin, an inhibitor of  
3 mitochondrial ATP synthase, significantly reduced PercevalHR (ex488 nm/ex458 nm)  
4 signals ( $48 \pm 1\%$  relative to the control) in CGN (Fig. S3). Reduction of PercevalHR  
5 signals was also detected to a lesser extent by administration of 50 mM 2-deoxyglucose  
6 ( $86 \pm 1\%$ ). Even though there was a large axon-to-axon variation, PercevalHR signals  
7 were gradually decreased depending on the distance from the mitochondria (Fig. 4E, F).  
8 Notably, there was a limitation that affected the measurement of absolute ATP  
9 concentrations. Nevertheless, these results suggest that relative ATP concentrations tend  
10 to be low at the axonal segment away from mitochondria, indicating that the density of  
11 stationary mitochondria could alter local ATP concentration.

12 Second, we asked whether ATP has a role in regulating the distribution of  
13 stationary mitochondria. To this end, 7 DIV CGNs were treated with phosphocreatine,  
14 which provides high-energy phosphate to convert ADP to ATP and is used to supply  
15 ATP to cells, including neurons (23, 24). Time-lapse imaging of axonal mitochondria  
16 revealed that phosphocreatine treatment increased the motility of mitochondria and  
17 significantly reduced the number of stationary mitochondria (Fig. 4G, H,  $14.5 \pm 1.2$  in  
18 controls versus  $10.5 \pm 0.7$  in phosphocreatine treatment per 100  $\mu$ m of axonal segment,  
19  $p < 0.01$ , Welch's t-test).

20

## 21 **Local inactivation of mitochondria affects the translocation of neighboring** 22 **mitochondria**

23 The results described above support the notion that the uniform distribution of  
24 stationary mitochondria is regulated by intermitochondrial signaling. To substantiate  
25 this idea, it would be desirable to control the signal molecule at specific axons, but it is  
26 technically difficult to locally manipulate the concentration of signal molecules such as  
27 ATP. Hence, we decided to locally manipulate the function of mitochondria instead by  
28 chromophore-assisted light inactivation (CALI) (Fig. 5A). It has been shown that light  
29 irradiation of mitochondria-localized KillerRed (KillerRed-dMito) results in the  
30 production of reactive oxygen species (ROS), thereby inactivating mitochondria locally  
31 at an illumination site (3, 25). Local illumination of green light resulted in the bleaching  
32 of KillerRed-dMito at a specific axonal site (Fig. 5B). Subsequently, the positions of

1 unilluminated mitochondria around the illumination site were monitored (Fig. 5C). To  
2 minimize KillerRed-dependent phototoxicity, images of both proximal and distal sites  
3 (up to 50  $\mu\text{m}$  from the border of the illumination site) were taken at 0, 30 and 60 min  
4 after illumination (Fig. 5C). The number of immovable mitochondria was quantified as  
5 shown in Fig. 1F. In control axons that did not receive photoillumination or that  
6 expressed mCherry-Mito instead of KillerRed-dMito, most of the mitochondria changed  
7 their location in 60 min (immovable mitochondria;  $45.0 \pm 5.0\%$  in KillerRed-dMito-  
8 expressing neurons without photoillumination,  $38.7 \pm 4.8\%$  in mCherry-Mito-  
9 expressing neurons with photoillumination) (Fig. 5C, D). In CALI-applied axons, the  
10 rate of immovable mitochondria was significantly increased ( $63.4 \pm 2.5\%$ ) compared  
11 with that in controls (Fig. 5D;  $p < 0.05$  compared with no illumination,  $p < 0.01$   
12 compared with mCherry-Mito, Tukey's test). Furthermore, phosphocreatine treatment  
13 prior to CALI application reduced the rate of immovable mitochondria ( $38.4 \pm 4.5\%$ ,  $p$   
14  $< 0.001$  compared with CALI-treated axons, Tukey's test). These results indicate that  
15 mitochondrial function increases the motility of other mitochondria and that ATP  
16 contributes to intermitochondrial signaling.

17

18

## 19 **DISCUSSION**

20

21 In this study, we showed that the distribution of stationary mitochondrial spots  
22 in premature CGN axons is not random but rather relatively uniform both in vitro and in  
23 vivo. Similar results were obtained from RGC culture and adult RGCs in the retina.  
24 These observations reaffirm the previous finding in cultured sensory neurons (16) and  
25 suggest that neurons generally possess a system that uniformly distributes mitochondria  
26 along their axons. In contrast to the presynaptic site of mature cortical neurons, in which  
27 mitochondria are immobilized over several hours (9), stationary mitochondria changed  
28 their location in a relatively short time in premature CGNs ( $t_{1/2} = 96$  min, at 7 DIV).  
29 Intriguingly, the positions of mitochondria changed over time, suggesting that the sites  
30 for mitochondrial capture changed over time.

31

32 What is the meaning of the uniform mitochondrial distribution? A previous  
study demonstrated that a reduction in stationary mitochondria in premature cortical

1 neurons causes a reduction in axonal branches (2, 26). Thus, stationary mitochondria are  
2 required for establishing and/or maintaining proper axonal arbors, likely by locally  
3 supplying ATP and/or regulating  $\text{Ca}^{2+}$  concentrations. If distribution is random, it is  
4 likely that mitochondrial deficiency will occur stochastically in certain axonal regions.  
5 In addition, premature axonal arbors undergo dynamic morphological changes, and  
6 stationary mitochondria need to be provided in newly growing branches. Constantly  
7 switching between motile and stationary states could enable mitochondria to adapt to  
8 such situations. Since axonal arbor morphology becomes static as an axon matures,  
9 neurons might regulate the balance between motile and stationary mitochondria  
10 depending on axonal maturation.

11 The present study revealed that axons possess a system that regulates  
12 mitochondrial distribution via intermitochondrial signals for the following reasons. If  
13 mitochondrial distribution is determined by the preexisting structure, such as  
14 presynaptic sites, the distribution of mitochondria should not largely change over time  
15 because after a mitochondrion moves away, another mitochondrion should be captured  
16 at the same position. However, our observations revealed that the positions of each  
17 mitochondrion changed considerably, suggesting the possibility that mitochondria  
18 remain distant from each other. Consistently, locally inhibiting mitochondria by  
19 applying CALI prevented the translocation of mitochondria at the neighboring region,  
20 revealing that functional mitochondria enhance the motility of other mitochondria.  
21 These observations are consistent with a previous report that mitochondria tend to be  
22 captured between preexisting mitochondria (16).

23 Producing ATP and controlling the  $\text{Ca}^{2+}$  concentration are the main functions  
24 of mitochondria. Our results suggested that ATP mediates intramitochondrial signaling,  
25 although we do not exclude the possibility of the contribution of other signaling  
26 molecules, including  $\text{Ca}^{2+}$ , that have been reported to affect mitochondrial motility (27-  
27 29). We demonstrated that supplying ATP with phosphocreatine application reduced  
28 immobile mitochondria that were induced by local mitochondrial inactivation. Since  
29 ATP is a small molecule, it should be rapidly diffused in the axoplasm after being  
30 produced by mitochondria, but rapid consumption in the axonal cytoplasm may create  
31 an ATP gradient. Indeed, in a previous study, an ATP gradient along the axon was  
32 observed depending on the distance from the growth cone (30). Using an ATP sensor,

1 we detected ATP concentration differences depending on the distance from  
2 mitochondria. This result contradicts a previous study reporting that ATP is uniformly  
3 distributed along axons (31). We believe that this discrepancy could be the result of a  
4 couple of differences. First, the PercevalHR that we used in the current study is more  
5 sensitive than the previously used Perceval (22). Second, while a previous study also  
6 reported ATP fluctuations in axons, the position of mitochondria was not taken into  
7 account since analysis focused on the ATP concentration throughout the axon. As  
8 mitochondria are distributed uniformly along axons, they will not be detectable unless  
9 they are compared with the distance from mitochondria in detail.

10 Our present study revealed an intracellular system regulating mitochondrial  
11 distribution and dynamics in axons. This system likely plays important roles in axonal  
12 arborization and reorganization. Finally, it is also interesting to note that axotomy  
13 induces a local reduction in mitochondrial motility accompanied by ATP depletion,  
14 which restricts axonal regeneration (30). Studying the molecules that receive ATP  
15 signals in the future could be valuable as it could lead to the ability to achieve efficient  
16 axonal regeneration.

## 19 MATERIALS AND METHODS

### 21 *Primary culture of neurons*

22 All animals were treated according to the institutional ethical guidelines, and  
23 experiments were approved by the animal ethics committees of the University of Fukui.  
24 Primary cultures of mouse CGNs were prepared from ICR (Jcl:ICR) mice (CLEA  
25 Japan, Inc, Tokyo, Japan) at postnatal days 4 to 6 as described previously (32). CGNs  
26 were dissociated with trypsin and plated on glass (at  $0.25\text{-}0.5 \times 10^6$  cells/cm<sup>2</sup>,  
27 depending on the experiment) that had been coated with poly-L-ornithine and attached  
28 to a silicon chamber (flexiPERM; Sarstedt, Nümbrecht, Germany). CGNs were  
29 maintained in Basal Medium Eagle (BME; Sigma-Aldrich, St. Louis, MO)  
30 supplemented with 10% calf serum (Thermo Fisher Scientific Inc., Waltham, MA),  
31 penicillin (1 mg/ml), streptomycin (1 mg/ml), glutamine (2 mM) and KCl (25 mM). For  
32 time-lapse analysis, Minimal Essential Medium without phenol red (MEM; Thermo



1 Fisher Scientific Inc.) supplemented with 20 mM HEPES-KOH pH 7.2 was used instead  
2 of BME. At 1 DIV, cytarabine was added to the culture (10  $\mu$ M), and the silicon  
3 chamber was removed to visualize the axonal extension.

4

#### 5 *Transfection in primary culture neurons*

6 To introduce plasmids into cultured CGNs, either electroporation or the calcium  
7 phosphate method was used. Electroporation was performed as previously described  
8 (33). CGNs ( $3 \times 10^6$  cells) and plasmids were suspended in 70  $\mu$ l of Dulbecco's  
9 modified Eagle's medium (Sigma-Aldrich) and exposed to decay pulses using a  
10 CUY21-edit II pulse generator (BEX, Tokyo, Japan) as follows: poring pulse, 275 V for  
11 1 ms; driving pulse, +20 V for 50 ms  $\times$  5 times at 50 ms intervals with reversal of  
12 polarity. In the experiment shown in Fig. 5, 1.2  $\mu$ g of KillerRed-dMito (Evrogen,  
13 Moscow, Russia) or mCherry-Mito-7 (Addgene #55102) (34) together with 2.8  $\mu$ g of  
14 mWasabi-Mito-7 (Addgene #56508) (35) and 0.5  $\mu$ g of bcl-xl/pcDNA3 (20) was  
15 introduced. Immediately after electroporation, prewarmed media was added to the cell,  
16 and  $5 \times 10^5$  cells were spread in the grass bottom plate attached with flexiPERM midi  
17 (Sarstedt). The calcium phosphate method was performed as previously described (32).  
18 Prior to transfection, neurons were incubated in Dulbecco's Modified Eagle's Medium  
19 (DMEM; FUJIFILM Wako Pure Chemical Co., Osaka, Japan) at 37  $^{\circ}$ C in a CO<sub>2</sub>  
20 chamber. For the experiments shown in Fig. 4E, 3  $\mu$ g of pGW-PervevalHR (Addgene  
21 #57432) (22), 0.1  $\mu$ g of mCherry-Mito-7 and 0.8  $\mu$ g of bcl-xl/pcDNA3 were suspended  
22 in 40  $\mu$ l of 250 mM CaCl<sub>2</sub> solution mixed with the same amount of 2 $\times$ HBS solution  
23 (270 mM NaCl, 9.5 mM KCl, 1.4 mM NaH<sub>2</sub>PO<sub>4</sub>, 15 mM glucose, 42 mM HEPES, pH  
24 7.1). After 15 min, the mixture was added to the culture and incubated for 15 min in a  
25 CO<sub>2</sub> incubator. After washing twice with DMEM, neurons were placed in the  
26 conditionalized medium.

27

#### 28 *Cell imaging*

29 To stain axonal mitochondria, neurons were treated with 500 nM MitoTracker  
30 Red CM-H<sub>2</sub>XRos (Thermo Fisher Scientific Inc.). For immunocytochemistry, neurons  
31 were fixed for 20 min with 4% paraformaldehyde (PFA) in phosphate buffered saline  
32 (PBS). Following permeabilization with 0.4% Triton X-100/PBS for 15 min, neurons



1 were placed in blocking solution (5% goat serum, 3% bovine serum albumin and 0.02%  
2 Tween 20 in PBS) and then treated with a monoclonal antibody against  $\alpha$ -tubulin  
3 (12G10 at 1:1000; Developmental Studies Hybridoma Bank of University of Iowa) in  
4 blocking solution at 4 °C overnight. Goat anti-mouse IgG conjugated to Alexa Fluor  
5 488 (1:1000; Abcam, Cambridge, UK) was the secondary antibody. For live-cell  
6 imaging of CGNs, a glass bottom dish was placed in a stage top incubator (ZILCS;  
7 Tokaihit, Shizuoka, Japan) maintained at 37 °C with a supply of 5% CO<sub>2</sub>. Mitochondria  
8 in the CGN axon were observed by using an Axiovert 200 M equipped with an MRm  
9 monochromatic digital camera (Carl Zeiss, Oberkochen, Germany). Images were  
10 acquired with 1388 × 1040 pixels using a 40× objective lens. For the CALI technique,  
11 the results for which are shown in Fig. 5, a small circular area defined by an iris was  
12 illuminated for 30 s with orange light by using a 100 W mercury arc lamp (HBO 100)  
13 through a bandpass filter (Ex BP/565/30) (Carl Zeiss) before obtaining images. For ATP  
14 imaging, signals were monitored by an LSM 5 Pascal confocal laser-scanning  
15 microscope equipped with an argon laser (Ex 488, Ex 458) (Carl Zeiss) with a  
16 resolution of 1024 × 1024 pixels using a 40× objective lens. Axonal segments  
17 containing terminal ends were subjected to imaging analysis.

18

### 19 *In vivo electroporation*

20 In vivo electroporation of mouse cerebella was performed as previously  
21 described (20, 33). To visualize mitochondria and axons, 2 µg of tdTomato-Mito-7  
22 (Addgene #58115) (36) and 2 µg of pEGFP-C1 (Takara Bio, Shiga, Japan), together  
23 with 0.5 µg of expression plasmid for bcl-xl, were utilized in 10 animals. P6 mice were  
24 anesthetized by hypothermia, and DNA in 0.3% fast green/PBS was injected into the  
25 surface of the cerebellar cortex with a microsyringe (Hamilton, Reno, NV). Animals  
26 were exposed to square electric pulses (4 pulses of 130–140 V for 50 ms with 950 ms  
27 intervals) by a pulse generator (CUY edit II) using a tweezer-type electrode attached to  
28 the head. Four days later (P10), mice were fixed by cardiac perfusion using 4% PFA in  
29 PBS under anesthesia. Cerebella were soaked overnight in a solution containing 30%  
30 sucrose in PBS at 4 °C and mounted in OTC compound (Sakura-Finetek, Alphen aan  
31 den Rijn, The Netherlands). Coronal sections (60 µm thick) were prepared by a cryostat  
32 microtome (CM1850, Leica, Wetzlar, Germany). After staining nuclei with Hoechst

1 33258 (Sigma-Aldrich), z-stack images were obtained using ApoTome 2 (Carl Zeiss)  
2 with a resolution of  $1388 \times 1040$  pixels by a  $20\times$  objective lens. Unlike in vitro culture,  
3 few images of long axonal segments containing terminals were obtained; thus, in vivo  
4 analysis was performed without being limited to such regions.

5

#### 6 *Thy1-mitoYFP mice*

7 To generate *Thy1-mitoYFP* mice, we obtained a DNA vector used to generate  
8 *Thy1-mitoCFP* mice (Jackson Laboratory, Bar Harbor, ME), which express cyan  
9 fluorescent protein (CFP) fused with human cytochrome c oxidase under the regulatory  
10 element of the mouse *Thy1* gene. After replacing the *CFP* gene with the *YFP* gene, the  
11 constructed vector was injected into fertilized donor mouse eggs from C57/B6J mice.  
12 The generated mice expressed YFP protein targeting mitochondria exclusively in  
13 neuronal cells, including RGCs (Fig. S2).

14 To obtain mitochondrial signals from retinal whole mounts of *Thy1-mitoYFP*  
15 mice, five 12-week-old male mice were terminally anaesthetized and perfusion-fixed  
16 with 4% PFA in PBS following a PBS flush. We enucleated the eyeballs, and the cornea  
17 was cut around the edge to remove the lenses and vitreous bodies. We then gently  
18 peeled out the retinas from the choroid and the sclera. After washing with PBS, the  
19 retinas were placed in 4% PFA in PBS and fixed for another hour. The retinas were  
20 rinsed with PBS and flattened by making four radial cuts. Afterward, they were  
21 mounted on slide glass and coverslipped using (Lab Vision PermaFluo (Thermo Fisher  
22 Scientific Inc.). We observed YFP signals in the whole-mount retinas with a FV1200  
23 confocal microscope (Olympus, Tokyo, Japan) and acquired the images with a  
24 resolution of  $1024 \times 1024$  pixels using a  $40\times$  objective lens at a  $0.5 \mu\text{m}$  step at the  
25 peripheral area approximately  $100 \mu\text{m}$  from the ora serrata. We stacked the images to  
26 show the very surface of the retina and retinal ganglion cell layer and processed the  
27 stacked images to analyze the position of mitochondria within the axons.

28

#### 29 *Data analysis*

30 Images of axons were analyzed using AxioVison software (Carl Zeiss) and  
31 subjected to analyses using ImageJ software (National Institute of Health, Bethesda,  
32 MD). To analyze the distribution of mitochondria, the place for imaging was decided

1 based on tubulin staining without observing mitochondrial signals. Quantification was  
2 conducted automatically by particle analysis using ImageJ. Mitochondria were deemed  
3 to be stationary when the maximum change in position during observation was less than  
4 5  $\mu\text{m}$  on kymographs or intermittent images. In the latter case, even if the position did  
5 not change, those whose area difference was more than twice were determined to be  
6 different mitochondria.

7 The  $I\delta$ -index was calculated from the following equation (1), where  $q$  is the  
8 number of parcels and  $x_i$  is the mitochondrial number in the parcel.

9

$$10 \quad I\delta = q \sum_{i=1}^q x_i(x_i - 1) / \sum_{i=1}^q x_i(\sum_{i=1}^q x_i - 1) \quad (1).$$

11

12 The fitting curve of stationary mitochondria in Fig. 1F was obtained from the  
13 one-phase decay equation, where  $M_s$  is the ratio of stationary mitochondria that undergo  
14 turnover,  $M_0$  is the immobile mitochondrial ratio, and  $\lambda$  is the decay rate. The half-life  
15 ( $t_{1/2}$ ) was calculated as follows (3):

16

$$17 \quad f(t) = M_0 + M_s e^{-\lambda t} \quad (2).$$

18

$$19 \quad t_{1/2} = \frac{\ln 2}{\lambda} \quad (3).$$

20

21 In bar and line graphs, data are expressed as the mean  $\pm$  95% confidence  
22 interval (CI). In the text, values are presented as the mean  $\pm$  S.E.M. We used Welch's t-  
23 test for statistical analysis unless otherwise stated. For multiple comparisons, we used  
24 Tukey's test. The levels of significance are denoted as follows: \* $p < 0.05$ , \*\* $p < 0.01$ ,  
25 \*\*\* $p < 0.001$ .

26

27

## 28 ACKNOWLEDGEMENTS

29 We are grateful to Dr. Hiroki Takada for the data analysis advice. The GW1-  
30 PercevalHR was a gift from Gary Yellen. The mCherry-Mito-7, tdTomato-Mito-7 and  
31 mWasabi-Mito-7 were gifts from Michael Davidson. This work was supported by a  
32 JSPS KAKENHI Grant Number 20K06889 (Y.K.) and grants from the Life Science

1 Innovation Center of the University of Fukui (Y.K., S.M. and T.T.).

2

### 3 **AUTHIR CONTRIBUTIONS**

4 Author contributions: N. M and Y.K. designed the research; N.M., I.H., T.T., and  
5 Y.K. performed the research; T.T., S.M., and M.I. contributed new reagents/analytic  
6 tools; N.M., I.H., T.M. and Y.K. analyzed the data; and Y.K. wrote the paper with the  
7 contribution of T.T.

8

9

### 10 **REFERENCES**

11

12 1. J. S. Kang *et al.*, Docking of axonal mitochondria by syntaphilin controls their  
13 mobility and affects short-term facilitation. *Cell* 132, 137-148 (2008).

14 2. J. Courchet *et al.*, Terminal axon branching is regulated by the LKB1-NUAK1  
15 kinase pathway via presynaptic mitochondrial capture. *Cell* 153, 1510-1525  
16 (2013).

17 3. M. Spillane, A. Ketschek, T. T. Merianda, J. L. Twiss, G. Gallo, Mitochondria  
18 coordinate sites of axon branching through localized intra-axonal protein synthesis.  
19 *Cell Rep* 5, 1564-1575 (2013).

20 4. T. L. Lewis, S. K. Kwon, A. Lee, R. Shaw, F. Polleux, MFF-dependent  
21 mitochondrial fission regulates presynaptic release and axon branching by limiting  
22 axonal mitochondria size. *Nat Commun* 9, 5008 (2018).

23 5. G. M. Smith, G. Gallo, The role of mitochondria in axon development and  
24 regeneration. *Dev Neurobiol* 78, 221-237 (2018).

25 6. M. J. Devine, J. T. Kittler, Mitochondria at the neuronal presynapse in health and  
26 disease. *Nat Rev Neurosci* 19, 63-80 (2018).

27 7. R. L. Morris, P. J. Hollenbeck, The regulation of bidirectional mitochondrial  
28 transport is coordinated with axonal outgrowth. *J Cell Sci* 104 (Pt 3), 917-927  
29 (1993).

30 8. N. Ohno *et al.*, Myelination and axonal electrical activity modulate the distribution  
31 and motility of mitochondria at CNS nodes of Ranvier. *J Neurosci* 31, 7249-7258  
32 (2011).

- 1 9. T. L. Lewis, G. F. Turi, S. K. Kwon, A. Losonczy, F. Polleux, Progressive Decrease  
2 of Mitochondrial Motility during Maturation of Cortical Axons In Vitro and  
3 In Vivo. *Curr Biol* 26, 2602-2608 (2016).
- 4 10. P. J. Hollenbeck, W. M. Saxton, The axonal transport of mitochondria. *J Cell Sci*  
5 118, 5411-5419 (2005).
- 6 11. N. Hirokawa, S. Niwa, Y. Tanaka, Molecular motors in neurons: transport  
7 mechanisms and roles in brain function, development, and disease. *Neuron* 68,  
8 610-638 (2010).
- 9 12. K. Obashi, S. Okabe, Regulation of mitochondrial dynamics and distribution by  
10 synapse position and neuronal activity in the axon. *Eur J Neurosci* 38, 2350-2363  
11 (2013).
- 12 13. Z. H. Sheng, Q. Cai, Mitochondrial transport in neurons: impact on synaptic  
13 homeostasis and neurodegeneration. *Nat Rev Neurosci* 13, 77-93 (2012).
- 14 14. Y. Takihara *et al.*, In vivo imaging of axonal transport of mitochondria in the  
15 diseased and aged mammalian CNS. *Proc Natl Acad Sci U S A* 112, 10515-10520  
16 (2015).
- 17 15. N. Ohno *et al.*, Mitochondrial immobilization mediated by syntaphilin facilitates  
18 survival of demyelinated axons. *Proc Natl Acad Sci U S A* 111, 9953-9958 (2014).
- 19 16. K. E. Miller, M. P. Sheetz, Axonal mitochondrial transport and potential are  
20 correlated. *J Cell Sci* 117, 2791-2804 (2004).
- 21 17. T. Yamada *et al.*, Sumoylated MEF2A coordinately eliminates orphan presynaptic  
22 sites and promotes maturation of presynaptic boutons. *J Neurosci* 33, 4726-4740  
23 (2013).
- 24 18. A. Gutnick, M. R. Banghart, E. R. West, T. L. Schwarz, The light-sensitive  
25 dimerizer zapalog reveals distinct modes of immobilization for axonal  
26 mitochondria. *Nat Cell Biol* 21, 768-777 (2019).
- 27 19. M. Morishita, Measuring of Dispersion of Individuals and Analysis of the  
28 Distribution Patterns. *Mem. Fac. Sci., Kyushu Univ., Ser. E (Biol.)* 2, 215-235  
29 (1959).
- 30 20. Y. Konishi, J. Stegmuller, T. Matsuda, S. Bonni, A. Bonni, Cdh1-APC controls  
31 axonal growth and patterning in the mammalian brain. *Science* 303, 1026-1030  
32 (2004).

- 1 21. A. Ito-Ishida *et al.*, Presynaptically released Cbln1 induces dynamic axonal  
2 structural changes by interacting with GluD2 during cerebellar synapse formation.  
3 *Neuron* 76, 549-564 (2012).
- 4 22. M. Tantama, J. R. Martínez-François, R. Mongeon, G. Yellen, Imaging energy  
5 status in live cells with a fluorescent biosensor of the intracellular ATP-to-ADP  
6 ratio. *Nat Commun* 4, 2550 (2013).
- 7 23. A. Oruganty-Das, T. Ng, T. Udagawa, E. L. Goh, J. D. Richter, Translational  
8 control of mitochondrial energy production mediates neuron morphogenesis. *Cell*  
9 *Metab* 16, 789-800 (2012).
- 10 24. K. Fukumitsu *et al.*, Synergistic action of dendritic mitochondria and creatine  
11 kinase maintains ATP homeostasis and actin dynamics in growing neuronal  
12 dendrites. *J Neurosci* 35, 5707-5723 (2015).
- 13 25. M. E. Bulina *et al.*, A genetically encoded photosensitizer. *Nat Biotechnol* 24, 95-  
14 99 (2006).
- 15 26. A. Vaarmann *et al.*, Mitochondrial biogenesis is required for axonal growth.  
16 *Development* 143, 1981-1992 (2016).
- 17 27. K. T. Chang, R. F. Niescier, K. T. Min, Mitochondrial matrix Ca<sup>2+</sup> as an intrinsic  
18 signal regulating mitochondrial motility in axons. *Proc Natl Acad Sci U S A* 108,  
19 15456-15461 (2011).
- 20 28. Y. Chen, Z. H. Sheng, Kinesin-1-syntaphilin coupling mediates activity-dependent  
21 regulation of axonal mitochondrial transport. *J Cell Biol* 202, 351-364 (2013).
- 22 29. S. Lee, W. Wang, J. Hwang, U. Namgung, K. T. Min, Increased ER-mitochondria  
23 tethering promotes axon regeneration. *Proc Natl Acad Sci U S A* 116, 16074-16079  
24 (2019).
- 25 30. B. Zhou *et al.*, Facilitation of axon regeneration by enhancing mitochondrial  
26 transport and rescuing energy deficits. *J Cell Biol* 214, 103-119 (2016).
- 27 31. D. Zala *et al.*, Vesicular glycolysis provides on-board energy for fast axonal  
28 transport. *Cell* 152, 479-491 (2013).
- 29 32. T. Seno *et al.*, Kinesin-1 sorting in axons controls the differential retraction of  
30 arbor terminals. *J Cell Sci* 129, 3499-3510 (2016).
- 31 33. Y. Inami, M. Omura, K. Kubota, Y. Konishi, Inhibition of glycogen synthase  
32 kinase-3 reduces extension of the axonal leading process by destabilizing

- 1 microtubules in cerebellar granule neurons. *Brain Res* 1690, 51-60 (2018).
- 2 34. S. G. Olenych, N. S. Claxton, G. K. Ottenberg, M. W. Davidson, The fluorescent  
3 protein color palette. *Curr Protoc Cell Biol* Chapter 21, Unit 21.25 (2007).
- 4 35. M. A. Rizzo, M. W. Davidson, D. W. Piston, Fluorescent protein tracking and  
5 detection: fluorescent protein structure and color variants. *Cold Spring Harb*  
6 *Protoc* 2009, pdb.top63 (2009).
- 7 36. H. W. Ai, K. L. Hazelwood, M. W. Davidson, R. E. Campbell, Fluorescent protein  
8 FRET pairs for ratiometric imaging of dual biosensors. *Nat Methods* 5, 401-403  
9 (2008).

10

11

## 12 **FIGURE LEGENDS**

13

14 Fig. 1. Dynamics of axonal mitochondria of premature CGNs in vitro.

15 (A) Schematic presentation of the culture method to separate axons from  
16 somatodendrites. CGNs were plated inside of a silicon chamber that was attached to the  
17 dish. The silicon chamber was removed at 1 DIV to allow axonal extension. (B)  
18 Representative time-lapse images of an axon at 3 DIV stained with MitoTracker.  
19 Examples for motile (white arrowheads) and stationary (open arrowheads) are indicated.  
20 (C, D) Kymographs (C) and quantified data (D) showing progressive reduction of  
21 mitochondrial motility with axonal maturation (n = 5 axons in each condition). (E)  
22 Representative time-lapse images of the CGN axon at 7 DIV stained with MitoTracker.  
23 Images were taken at 15 min intervals, and those at the indicated time points are shown.  
24 White arrowheads indicate mitochondria that remained in the same position, whereas an  
25 open arrowhead indicates a mitochondrion that changed position. (F) The percentage of  
26 mitochondria in which the positional change was less than 5  $\mu\text{m}$  from the initial position  
27 was quantified. The fitting curve using a one-phase decay model was also revealed.  
28 Data were obtained from n = 6 axons. Scale bars indicate 10  $\mu\text{m}$ . Values represent the  
29 mean  $\pm$  95% CI, \*\*p < 0.01, \*\*\*p < 0.001, Tukey's test.

30

31 Fig. 2. The distribution of mitochondrial spots along axons is relatively uniform in vitro.

32 (A) Representative images of a 7 DIV CGN axon stained with MitoTracker and anti-



1 tubulin antibody. Examples of image processing for compartment analysis showing  
2 straightened axons and binary images are also depicted at the bottom. Scale bars  
3 indicate 20  $\mu\text{m}$ . (B) Schematic presentation of typical distributions and I $\delta$ -index profiles  
4 of each case. (C) The I $\delta$ -index profile of axonal mitochondrial spots obtained from  
5 cultured CGN axons at 7 DIV. Data were obtained from distal axonal segments (0 - 120  
6  $\mu\text{m}$  from the terminal, n = 20 axons). Values represent the mean  $\pm$  95% CI. The dotted  
7 line indicates the I $\delta$ -index profile for complete uniform distribution. (D) Frequency of  
8 observed mitochondrial spots (solid line) versus Poisson distribution (dotted line) at a  
9 compartment size of 20  $\mu\text{m}$  indicated that the mitochondrial spot distribution is  
10 significantly different from a random distribution (\*\*p < 0.01,  $\chi^2$  analysis).

11

12 Fig. 3. Distribution of mitochondrial spots in CNS axons in vivo. (A) Representative  
13 image of a coronal cerebellar section from a P10 mouse, which has been electroporated  
14 with expression vectors for mCherry-Mito (Red; arrows) and EGFP (Green) at P6.  
15 Layer structure of the cerebellum visualized by nuclear staining (blue) indicating that  
16 the CGN axon extends in the external granule layer. Straightened binary images  
17 indicating mitochondrial position are also shown (bottom). EGL: external granule layer,  
18 ML: molecular layer, IGL: internal granule layer. (B) I $\delta$ -index profiles of axonal  
19 mitochondrial spots in CGN axons obtained from P10 cerebella. Data were collected  
20 from n = 22 axons (120  $\mu\text{m}$  segment) from 4 cerebella. (C) Frequency of mitochondrial  
21 spots observed in vivo (solid line) versus a Poisson distribution (dotted line). Since the  
22 mitochondrial density was lower than in vitro culture, data were analyzed by 40  $\mu\text{m}$  of  
23 compartment. (D) Representative image as well as straightened and binary images of  
24 RGC axons in the retinal nerve layer of *Thy1-mitoYFP* transgenic mice. The axonal  
25 region where mitochondria (arrows) within a single axon can be visualized was used for  
26 the analysis. (E) I $\delta$ -index profiles of axonal mitochondrial spots in RGC axons obtained  
27 from 12-week-old mouse retinas. Data were collected from n = 38 axons (120  $\mu\text{m}$   
28 segment) from 5 animals. (F) Frequency of mitochondrial spots observed in retina (solid  
29 line) versus a Poisson distribution (dotted line). Data were analyzed by 20  $\mu\text{m}$   
30 compartments. Values represent the mean  $\pm$  95% CI (\*p < 0.05, \*\*\*p < 0.001,  $\chi^2$   
31 analysis). Scale bars indicate 50  $\mu\text{m}$ .

32



1 Fig. 4. Analysis of the mechanisms that uniformly distribute mitochondria in axons.  
2 (A) Schematic presentation of two models to control uniform mitochondrial  
3 distribution; anchoring positions were predetermined (a) or determined by  
4 intermitochondrial interaction (b). (B) Representative images of axonal mitochondria at  
5 the indicated time points. Note the difference in mitochondrial positions at different  
6 times. Scale bar indicates 20  $\mu\text{m}$ . (C) Pearson's correlation coefficient of mitochondrial  
7 position between the indicated time points revealed a large reduction in 120 min. Data  
8 were obtained from  $n = 8$  axons. (D) I $\delta$ -index of axonal mitochondrial spots at three  
9 different compartment sizes showing that mitochondrial distribution is relatively  
10 uniform over time. (E) Axon of CGN expressing the ATP sensor PercevalHR and  
11 mCherry-Mito. Signals for ATP (Ex 488), the isosbestic point (Ex 458) and the ATP  
12 ratio (Ex 488/458) are shown. Scale bar indicates 10  $\mu\text{m}$ . (F) The ATP ratio in each  
13 position relative to the terminal of the mitochondrial position was revealed. Axonal  
14 regions with distances between mitochondria ranging from 10 to 15  $\mu\text{m}$  were analyzed  
15 ( $n = 44$  axonal regions). (G, H) Representative kymographs (G) and quantified results  
16 (H) of axonal mitochondria in the presence or absence of 1 mM phosphocreatine (PCr)  
17 (control;  $n = 16$  axons, PCr;  $n = 22$  axons in 4 experiments). Images were taken for 15  
18 min. Scale bar indicates 20  $\mu\text{m}$ . Values represent the mean  $\pm$  95% CI. \*\* $p < 0.01$ ,  
19 Welch's t-test.

20

21 Fig. 5. Effect of local mitochondrial inactivation on mitochondrial dynamics.

22 (A) Schematic presentation of the procedure for CALI-mediated analysis of  
23 intermitochondrial interactions. Mitochondria were locally inactivated by CALI, and the  
24 dynamics of neighboring mitochondria were analyzed. (B) Representative images of  
25 axonal mitochondria expressing Mito-KillerRed before and after local illumination.  
26 Signals for mWasabi-Mito were also revealed. (C) Representative images of linearized  
27 axons at the indicated times after photoillumination. Part of the illumination areas  
28 (Area) and proximal regions to the illumination area (up to 50  $\mu\text{m}$  from the border) are  
29 shown. First row: neurons were expressed with Mito-KillerRed, but no illumination was  
30 applied. Second row: neurons expressing mCherry-Mito as a control were locally  
31 illuminated. Third row: neurons expressing Mito-KillerRed were locally illuminated.  
32 Fourth row: neurons expressing Mito-KillerRed were pretreated with phosphocreatine

1 (PCr) before the illumination. (D) Percentages of immobile mitochondria 60 min after  
2 CALI were measured as in Fig. 1F. Local inactivation of mitochondria significantly  
3 increased the ratio of immobile mitochondria at the neighboring region, and  
4 phosphocreatine was reduced to the control level. In each condition, n = 12 axons in 3  
5 experiments were analyzed. Scale bars indicate 20  $\mu\text{m}$ . Values represent the mean  $\pm$   
6 95% CI, \*p < 0.05, \*\*p < 0.01, \*\*\*p < 0.001, Tukey's test.

7

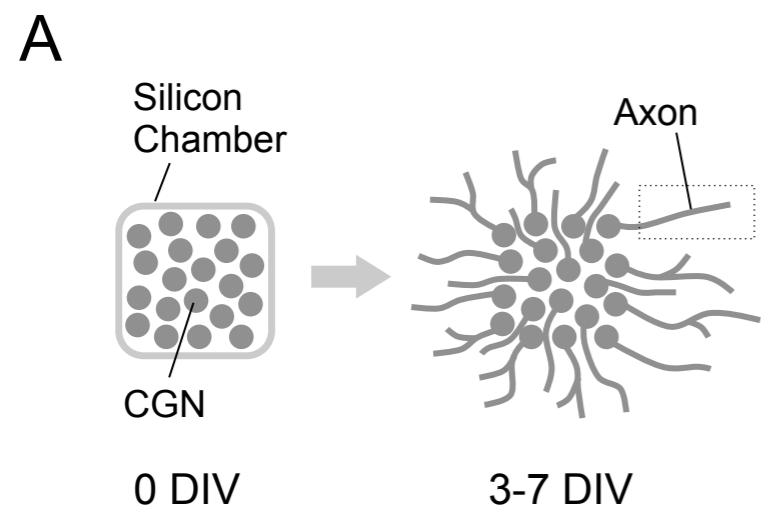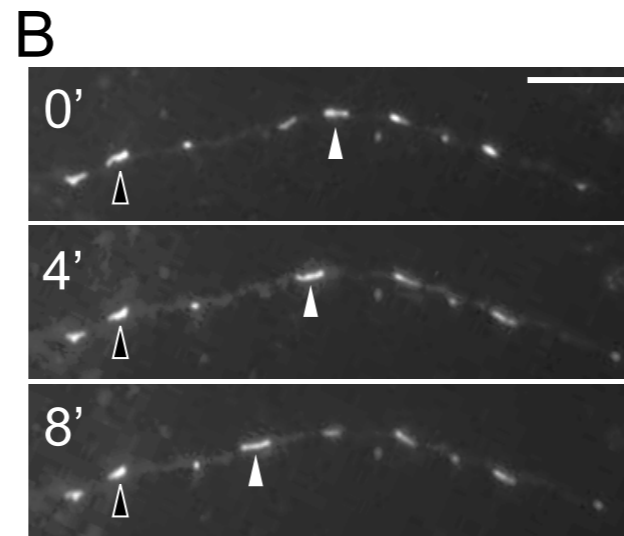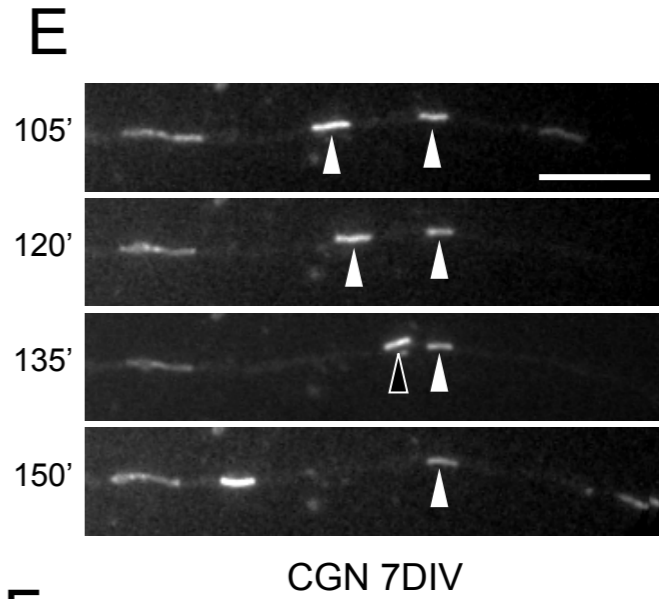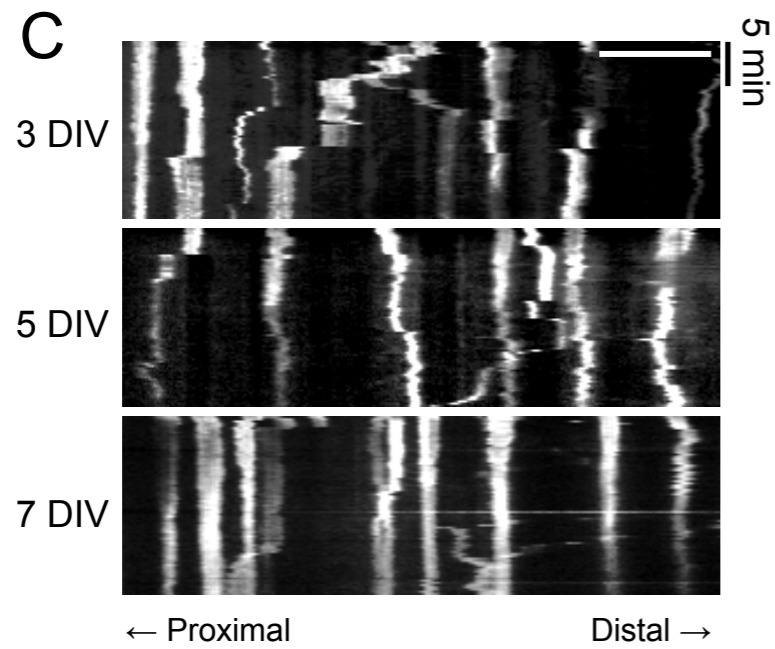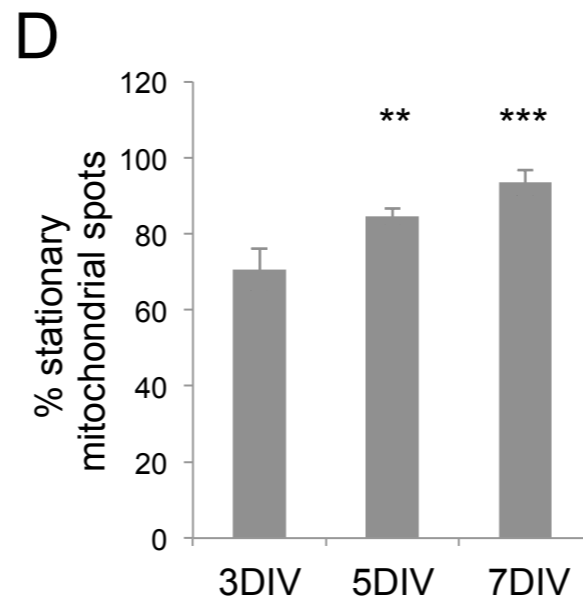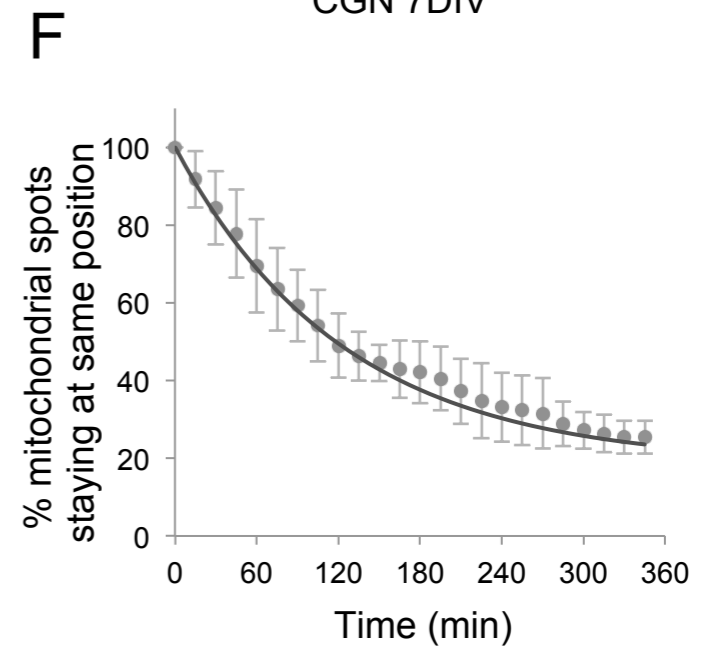

Fig. 1

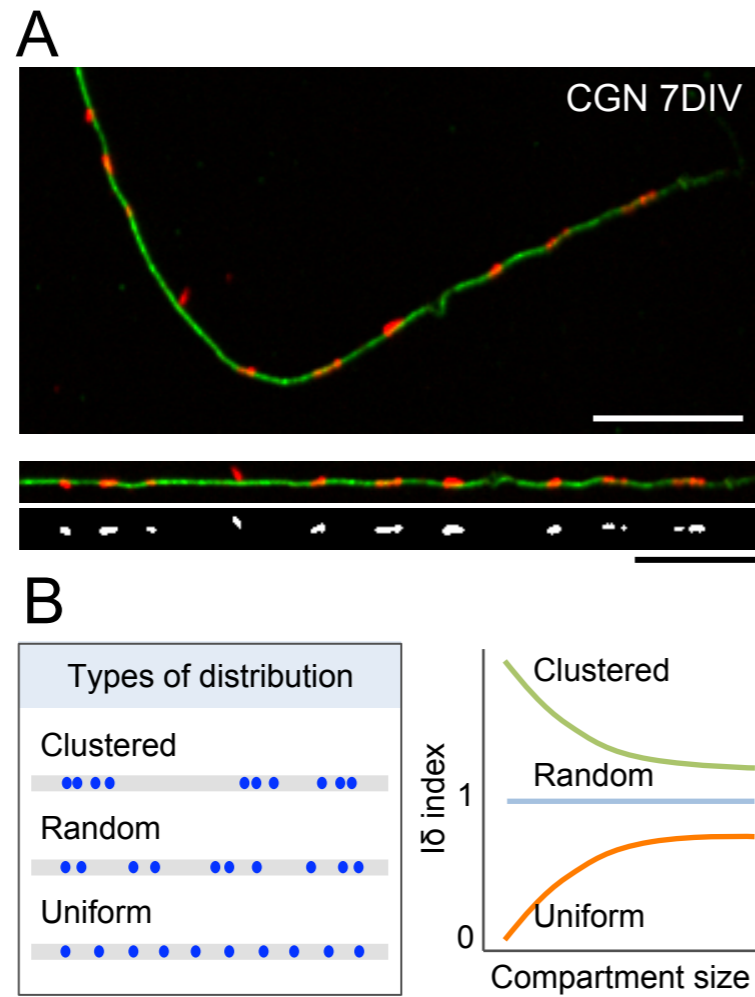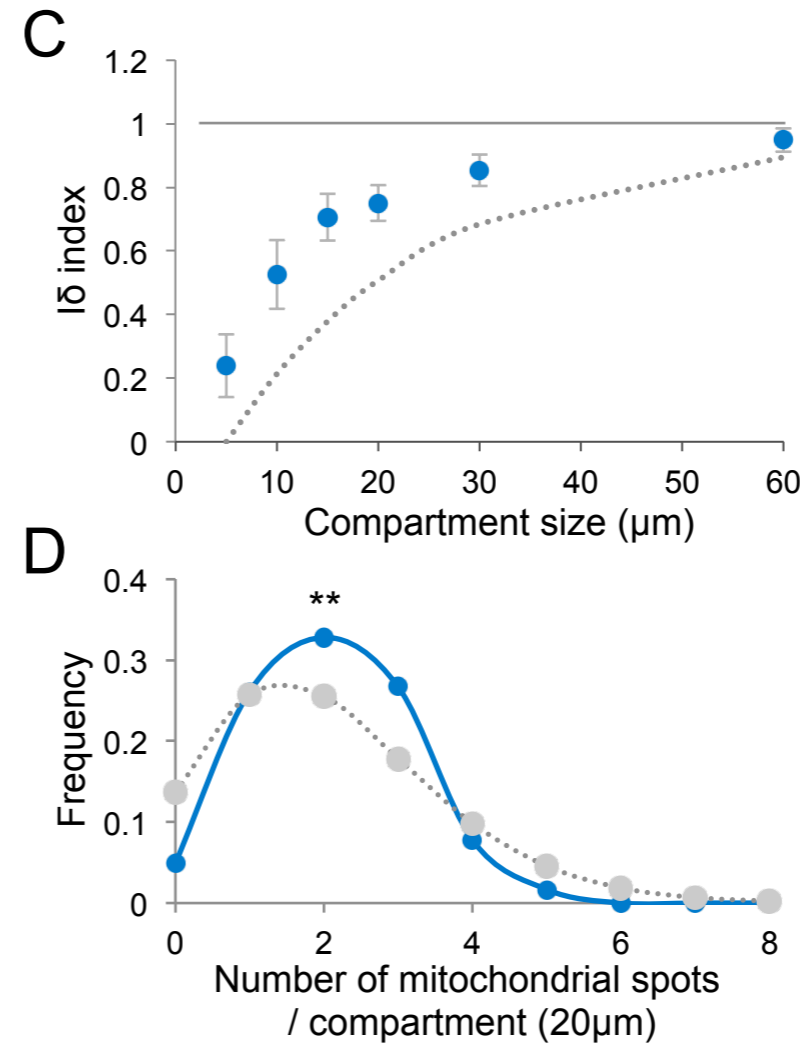

Fig. 2

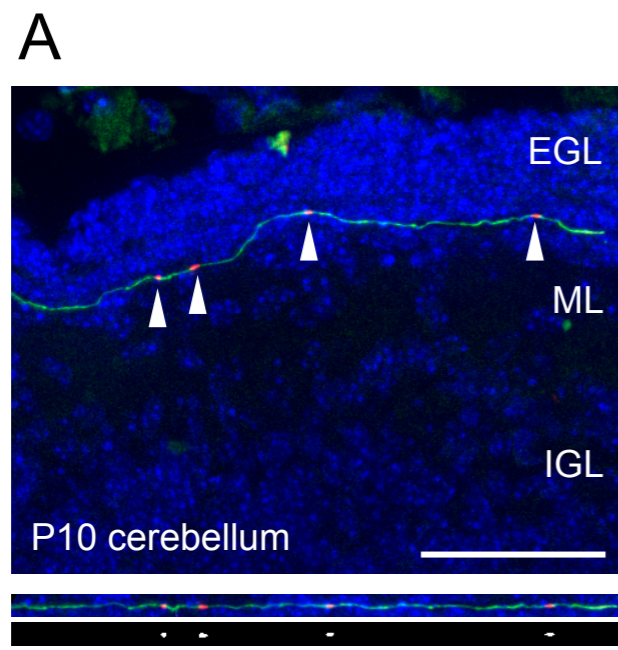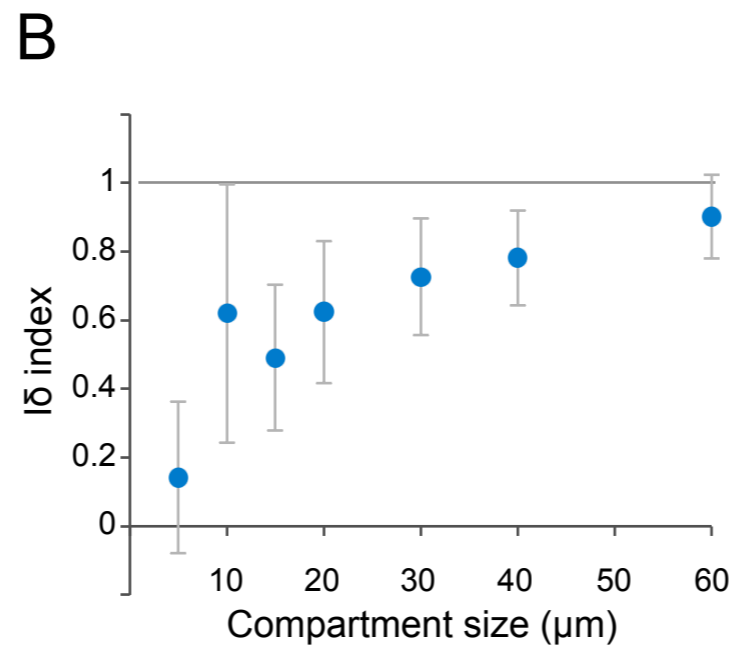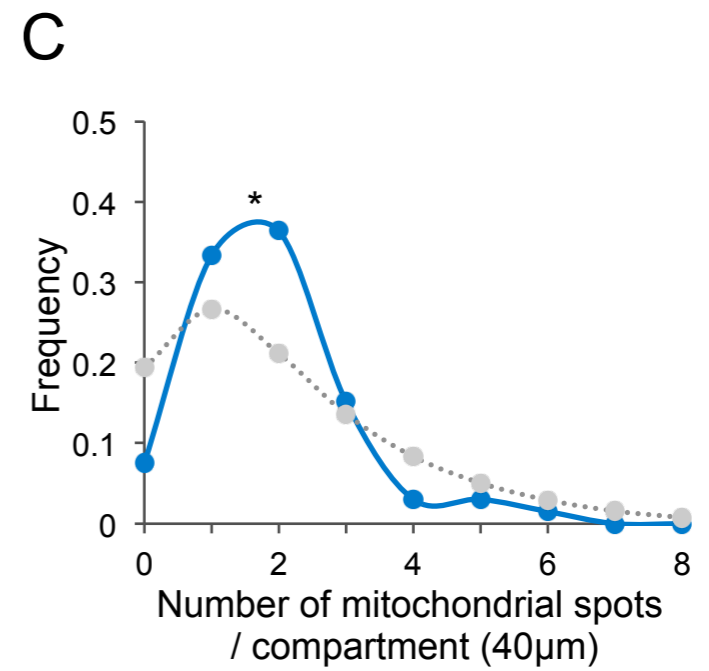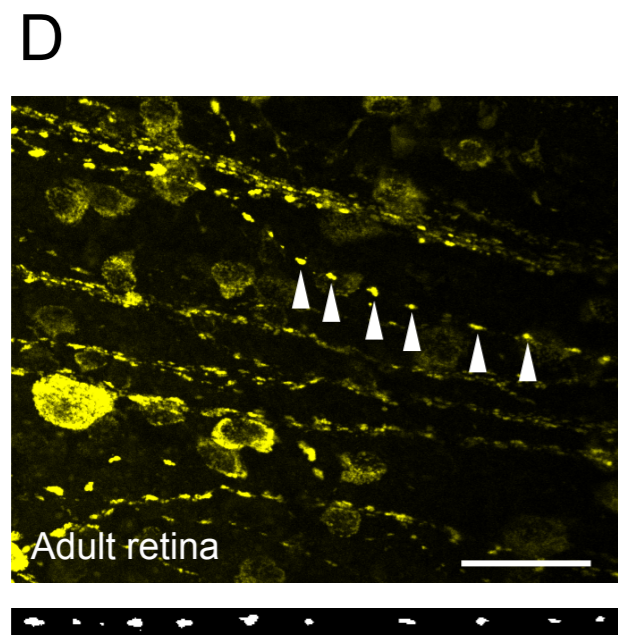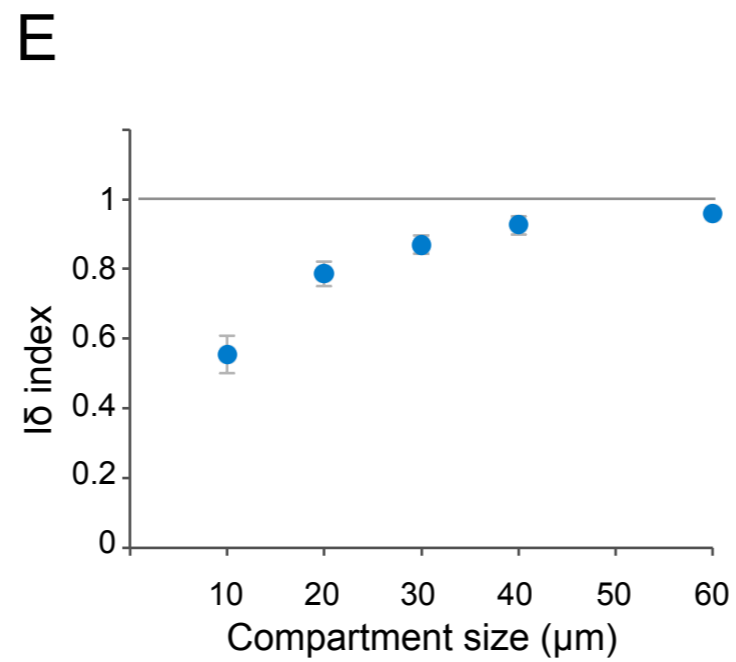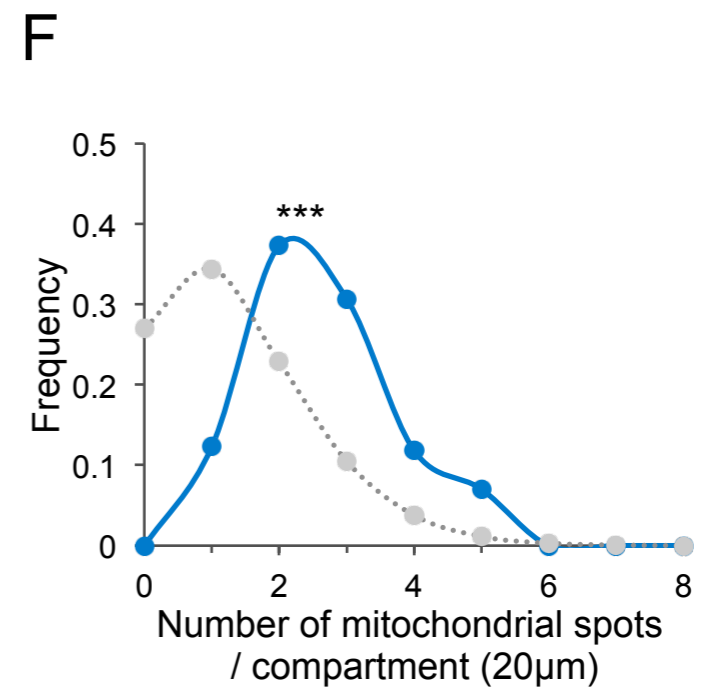

Fig. 3

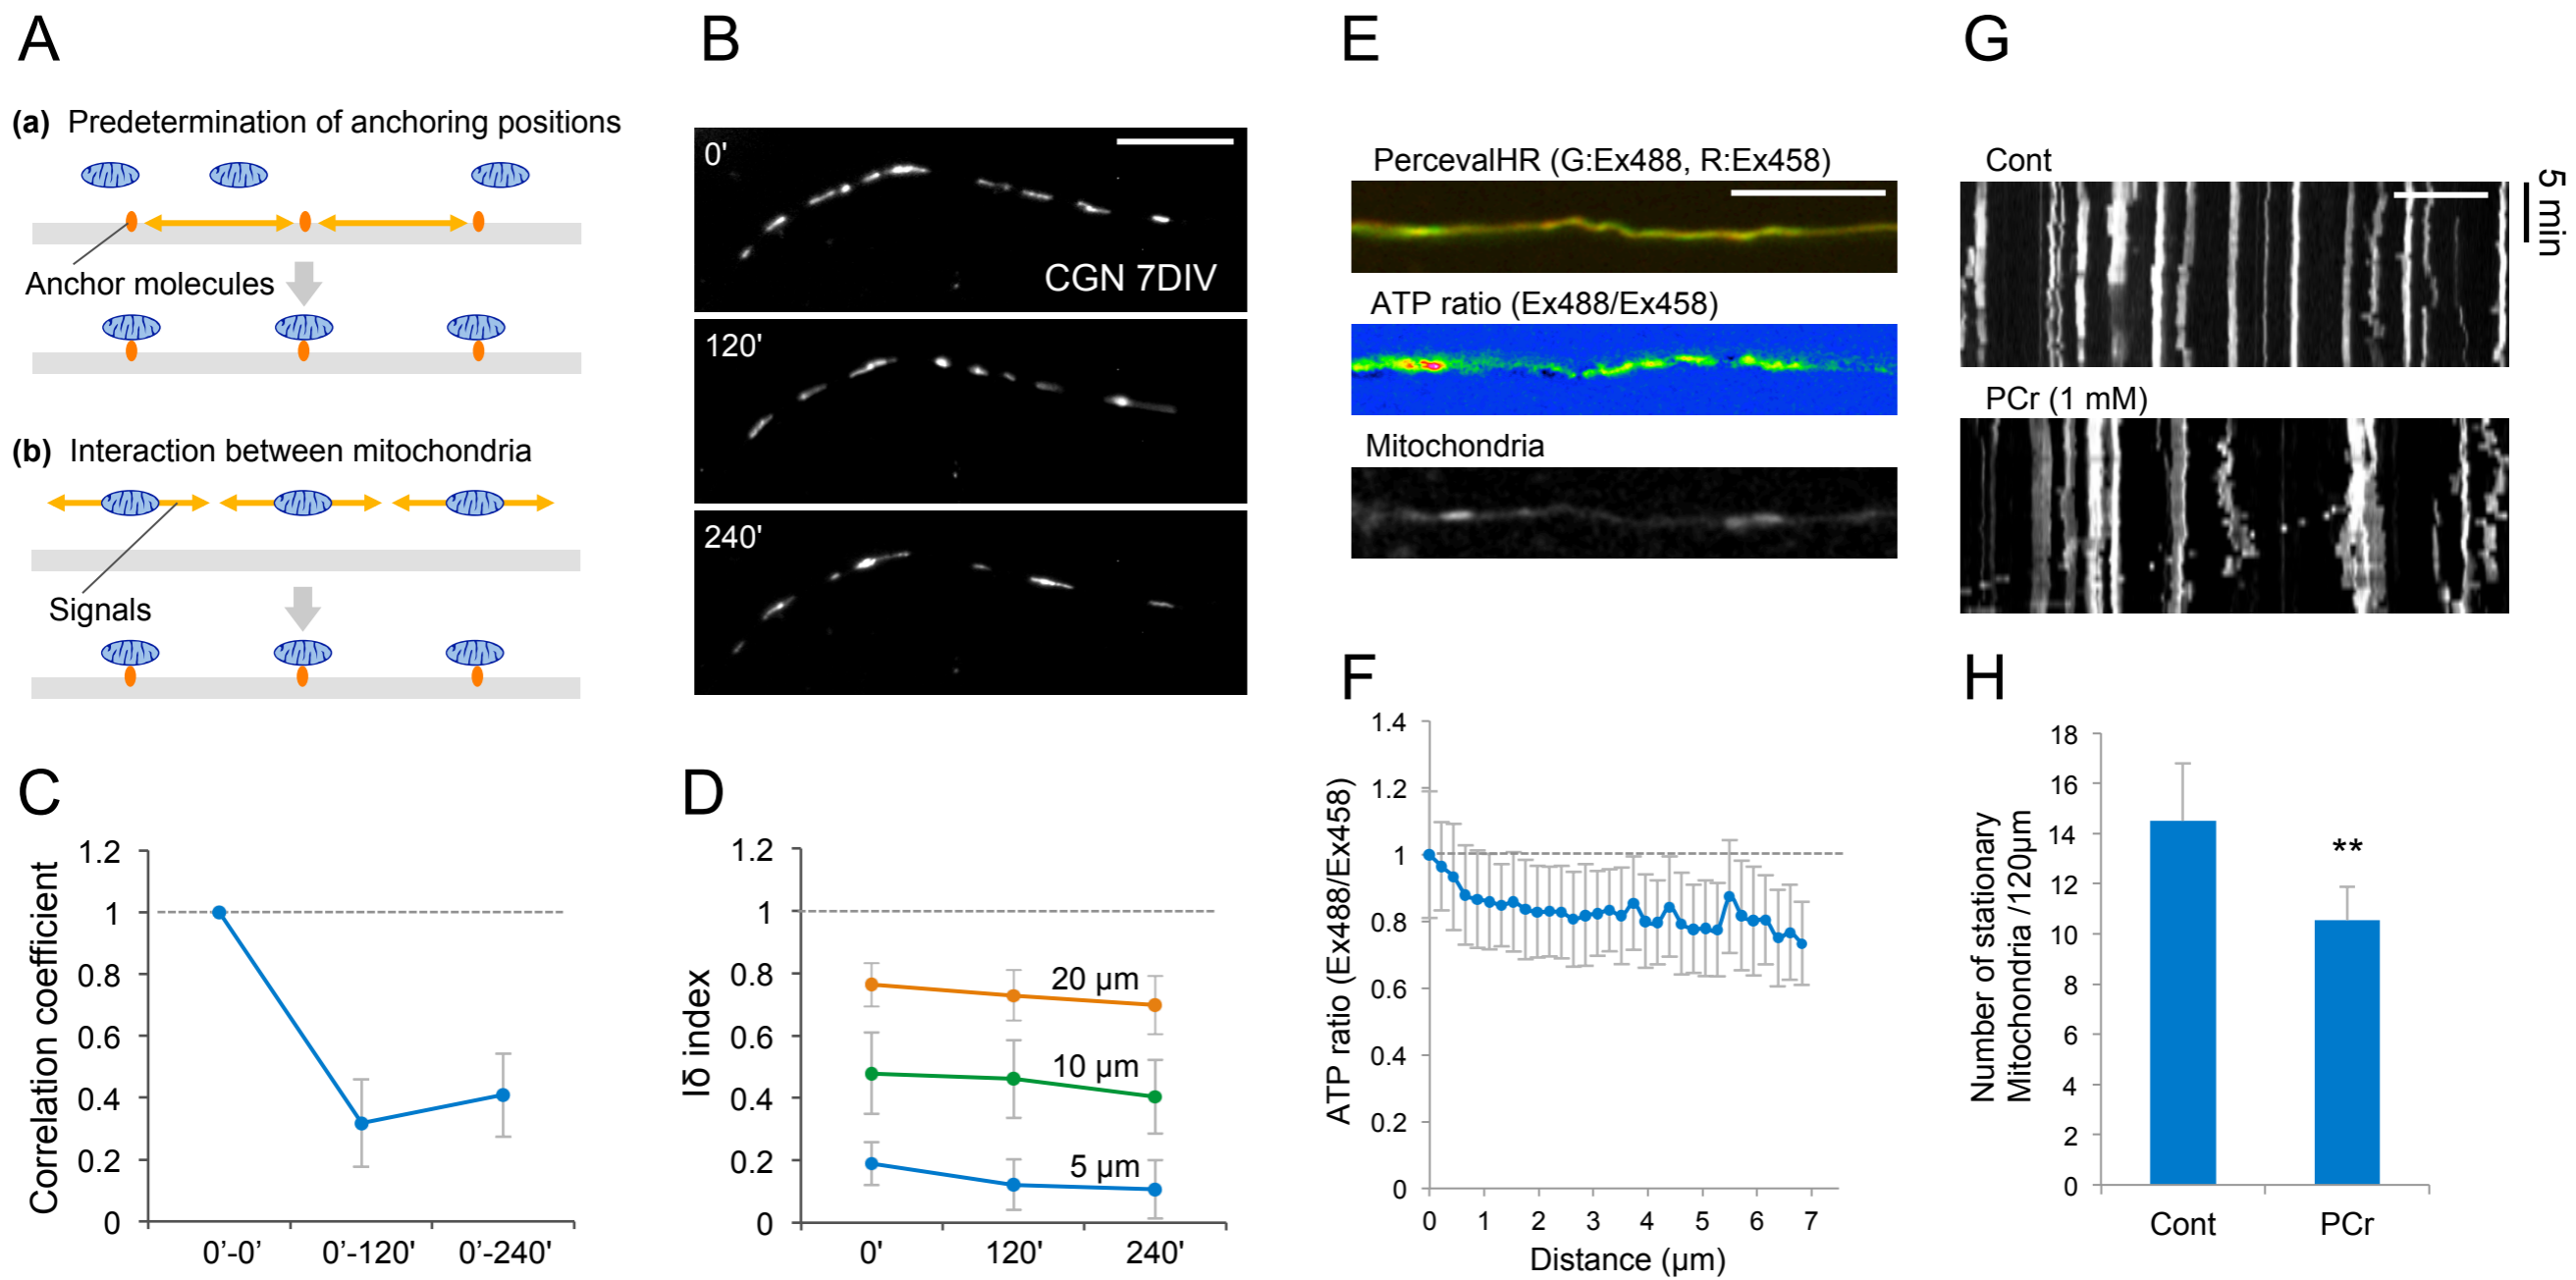

Fig. 4

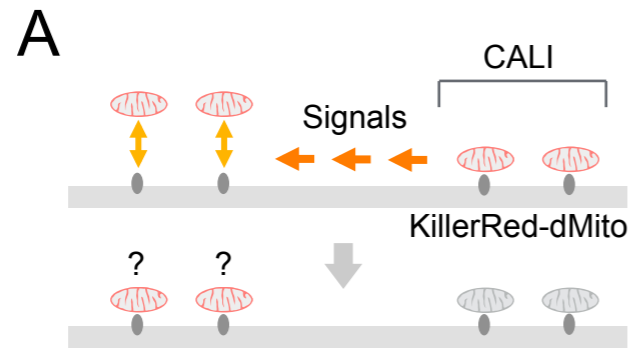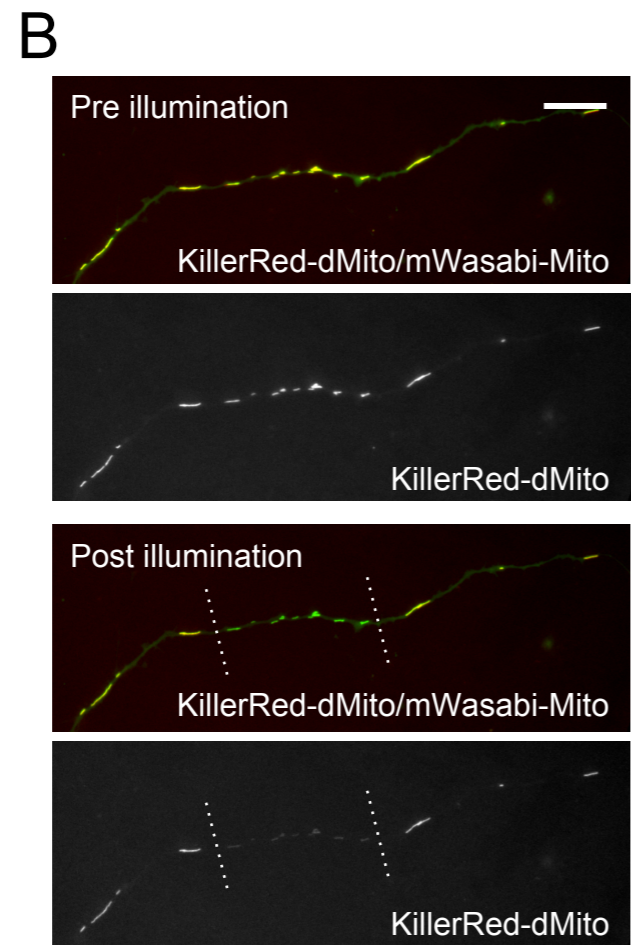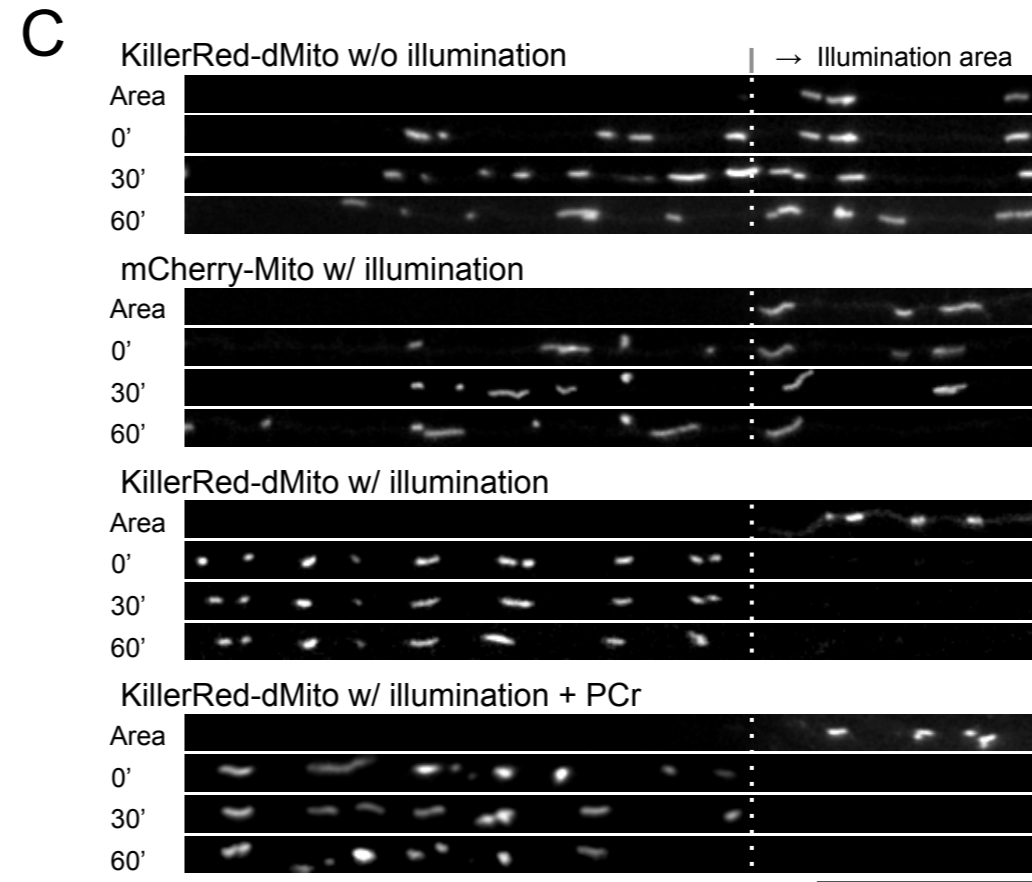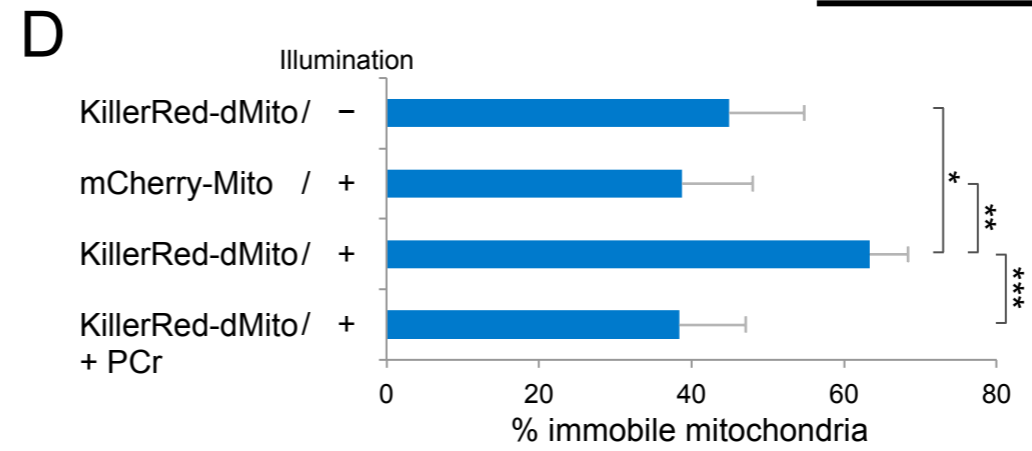

Fig. 5
